# Supplementary material for: Molecular basis for disassembly of an importin:ribosomal protein complex by the escortin Tsr2
Source: Springer Nature journal article supplement (doi:10.1038/s41467-018-06160-x), 2018-09-04
Supplement: MOESM1 [file 41467_2018_6160_MOESM1_ESM.pdf]

**Molecular basis for disassembly of an importin:ribosomal protein complex by the escortin Tsr2**

Schütz et al.

**Supplementary Data**

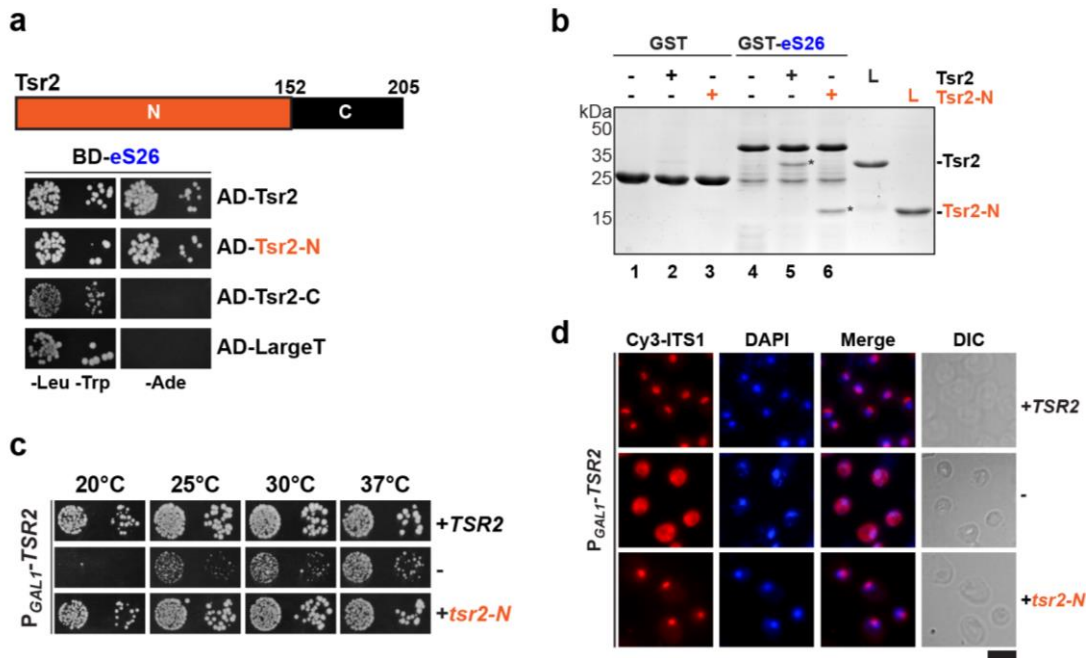

### Supplementary Figure 1

The N-terminal domain of Tsr2 is sufficient for its function *in vivo*. **(a)** Tsr2 and Tsr2<sup>1-152</sup> (Tsr2-N) but not Tsr2<sup>153-205</sup> (Tsr2-C) interacts with eS26 in a yeast two-hybrid assay. Upper panel: Scheme showing domain architecture of Tsr2. Tsr2<sup>1-152</sup> (Tsr2-N) in orange, Tsr2<sup>153-205</sup> (Tsr2-C) in black. Lower panel: Plasmids encoding the indicated *GAL4* DNA-binding domain (*BD*) and *GAL4* activation domain (*AD*) fusion proteins were transformed into the yeast reporter strain NMY32. Transformants were spotted in 10-fold serial dilutions onto SD-Leu-Trp (-Leu-Trp) or SD-Ade (-Ade) and incubated at 30°C for 4 days. Growth on SD-Ade indicates a strong two-hybrid interaction. The SV40 Large T antigen served as negative control for these analyses. **(b)** Tsr2 and Tsr2-N directly bind eS26 *in vitro*. L= input (1:10 diluted). **(c)** Tsr2-N is sufficient to support yeast growth. The conditional P<sub>GAL1</sub>-TSR2 strain was transformed with empty vector or vector with *TSR2* WT or *tsr2-N*. Transformants were spotted in 10-fold dilutions on repressive glucose containing media and grown at indicated temperatures for 2-4 days. **(d)** Tsr2-N is sufficient for 20S pre-rRNA processing. P<sub>GAL1</sub>-TSR2 cells transformed with WT *TSR2* or *tsr2-N* were grown at 30°C in glucose containing media to mid-log phase. Localization of 20S pre-rRNA was analyzed by FISH using a Cy3-labeled oligonucleotide complementary to the 5' portion of ITS1 (red). Nuclear and mitochondrial DNA was stained with DAPI (blue). Scale bar = 5 μm.

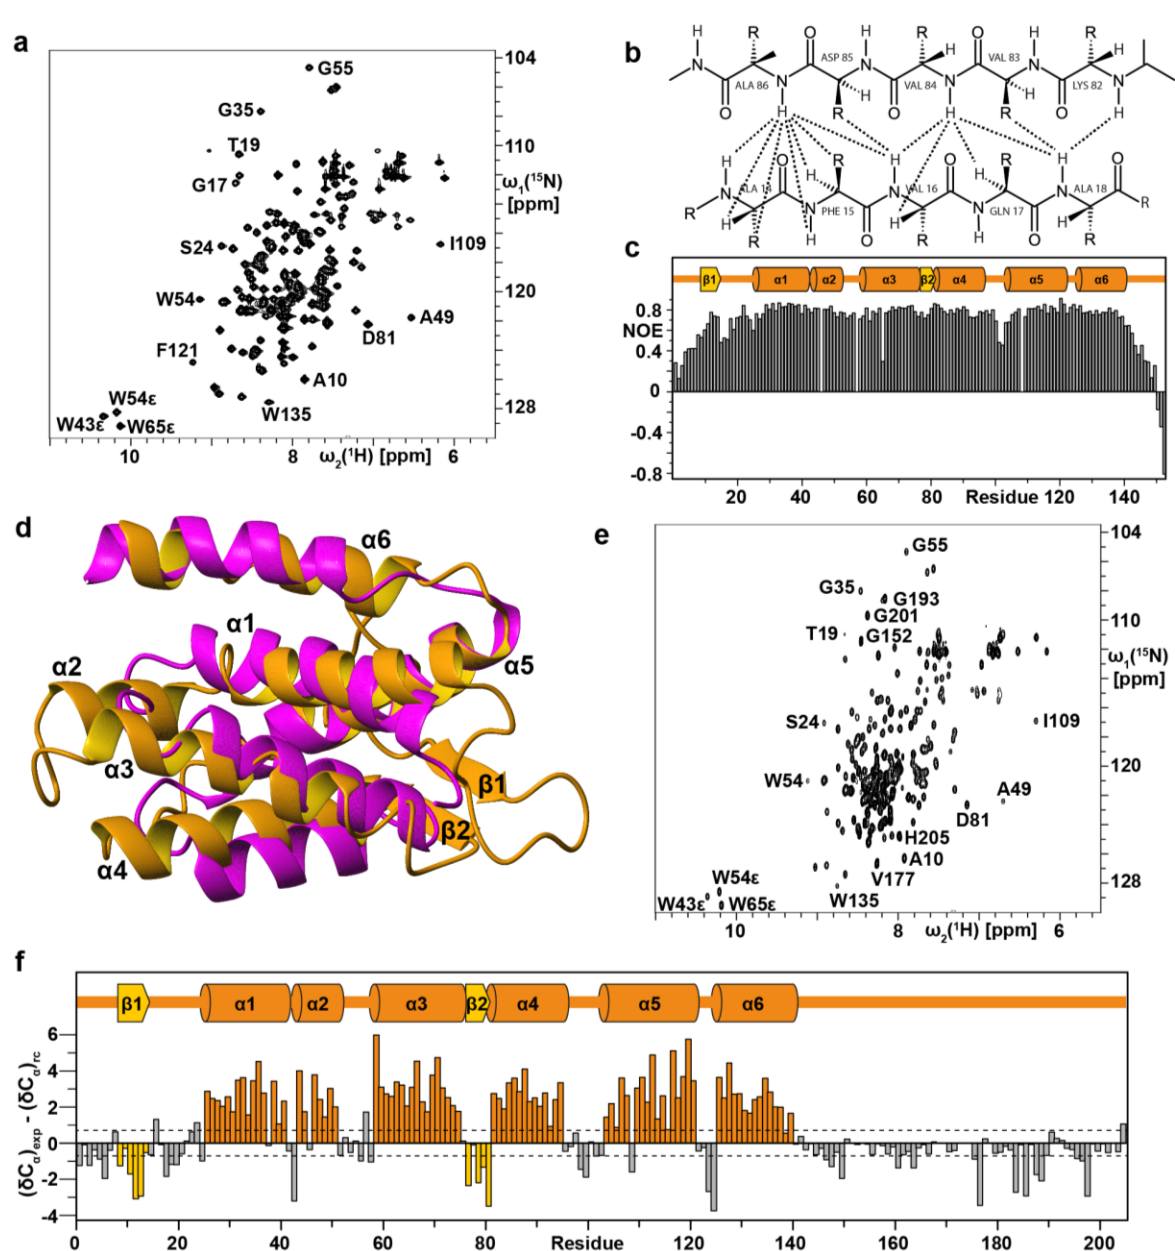

### Supplementary Figure 2

NMR analysis of Tsr2-N and full-length Tsr2. **(a)** 2D [ $^1\text{H}$ ,  $^{15}\text{N}$ ]-HSQC spectrum of Tsr2-N recorded at 293.15 K. The assignments of a number of characteristic resonances are indicated. **(b)** Manual assignment of interstrand  $^1\text{H}$ ,  $^1\text{H}$ -NOEs (dotted lines) to confirm the presence of  $\beta$ -sheets in the solution structure Tsr2-N. **(c)**  $^{15}\text{N}\{^1\text{H}\}$  NOE experiment of Tsr2-N recorded at 293.15 K and 700 MHz. **(d)** Superposition of cartoon representations of Tsr2-N (orange, lowest energy conformer) and Nab2 (magenta, PDB-2JPS) based on minimization of the rmsd between residues 26-43, 61-74, 82-92, 101-121, 129-142 of Tsr2-N and residues 4-21, 27-40, 46-56, 60-80, and 85-98 of Nab2. **(e)** 2D [ $^1\text{H}$ ,  $^{15}\text{N}$ ]-HSQC spectrum of full-length Tsr2 recorded at 303.15 K. Assignments of various characteristic signals are shown. **(f)** Secondary structure analysis of full-length Tsr2 based on the deviation of the assigned  $^{13}\text{C}\alpha$  shifts from their respective random coil values<sup>1</sup>. The derived  $\alpha$ -helices and  $\beta$ -strands are indicated with orange and yellow bars, respectively, and the dotted lines indicate the value of the standard deviation values of 0.7 ppm and -0.7 ppm.

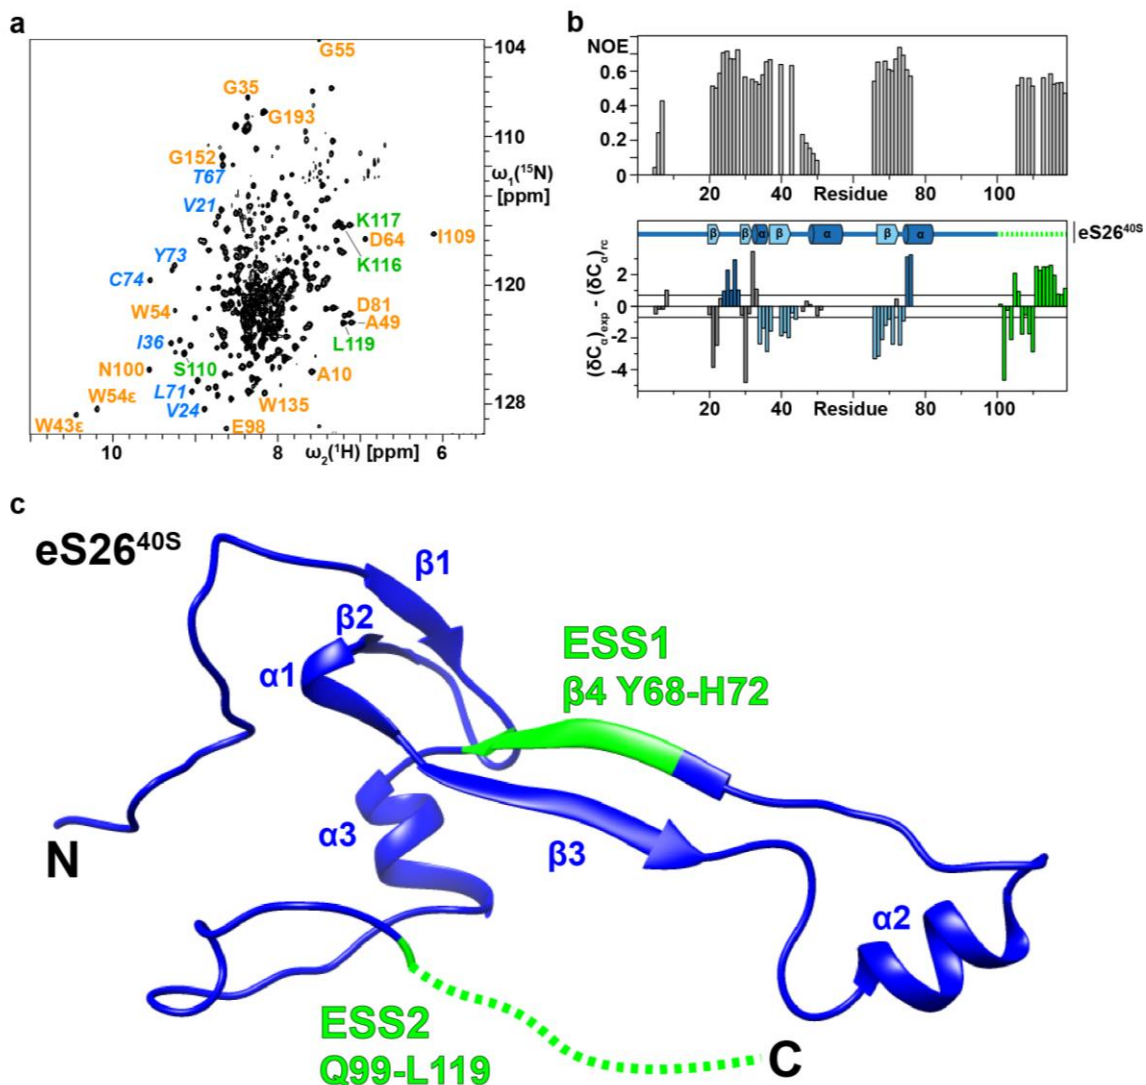

### Supplementary Figure 3

NMR analysis of Tsr2 in complex with eS26. **(a)** 2D [<sup>1</sup>H, <sup>15</sup>N]-TROSY spectrum of full-length Tsr2 in complex with eS26 recorded at 303.15 K. The assignments of characteristic resonances of Tsr2 and eS26 are indicated with orange (Tsr2) and green (eS26) letters, respectively. **(b)** NMR analysis of full-length eS26 in complex with Tsr2. The <sup>15</sup>N{<sup>1</sup>H} NOE data of eS26 in complex with Tsr2 shows that the conformational mobility for most of the assigned residues is similar to a folded protein, and the <sup>13</sup>Cα chemical shift deviations from random coil values<sup>1</sup> show that these regions have secondary structure similar to that observed when eS26 is part of the ribosome. Schematics of secondary structure observed for eS26 in the 40S particle of the ribosome and determined from <sup>13</sup>Cα shifts when it is bound to Tsr2 are shown at the top. The C-terminal residues 99–119 of eS26 (ESS2), which are not visible in the X-ray structure of the eukaryotic ribosome possess low conformational mobility and Cα shifts indicate the formation an α-helix comprising residues 111–119. **(c)** X-ray structure of yeast eS26 as bound in the mature 40S ribosome (PDB-4V88)<sup>2</sup>.

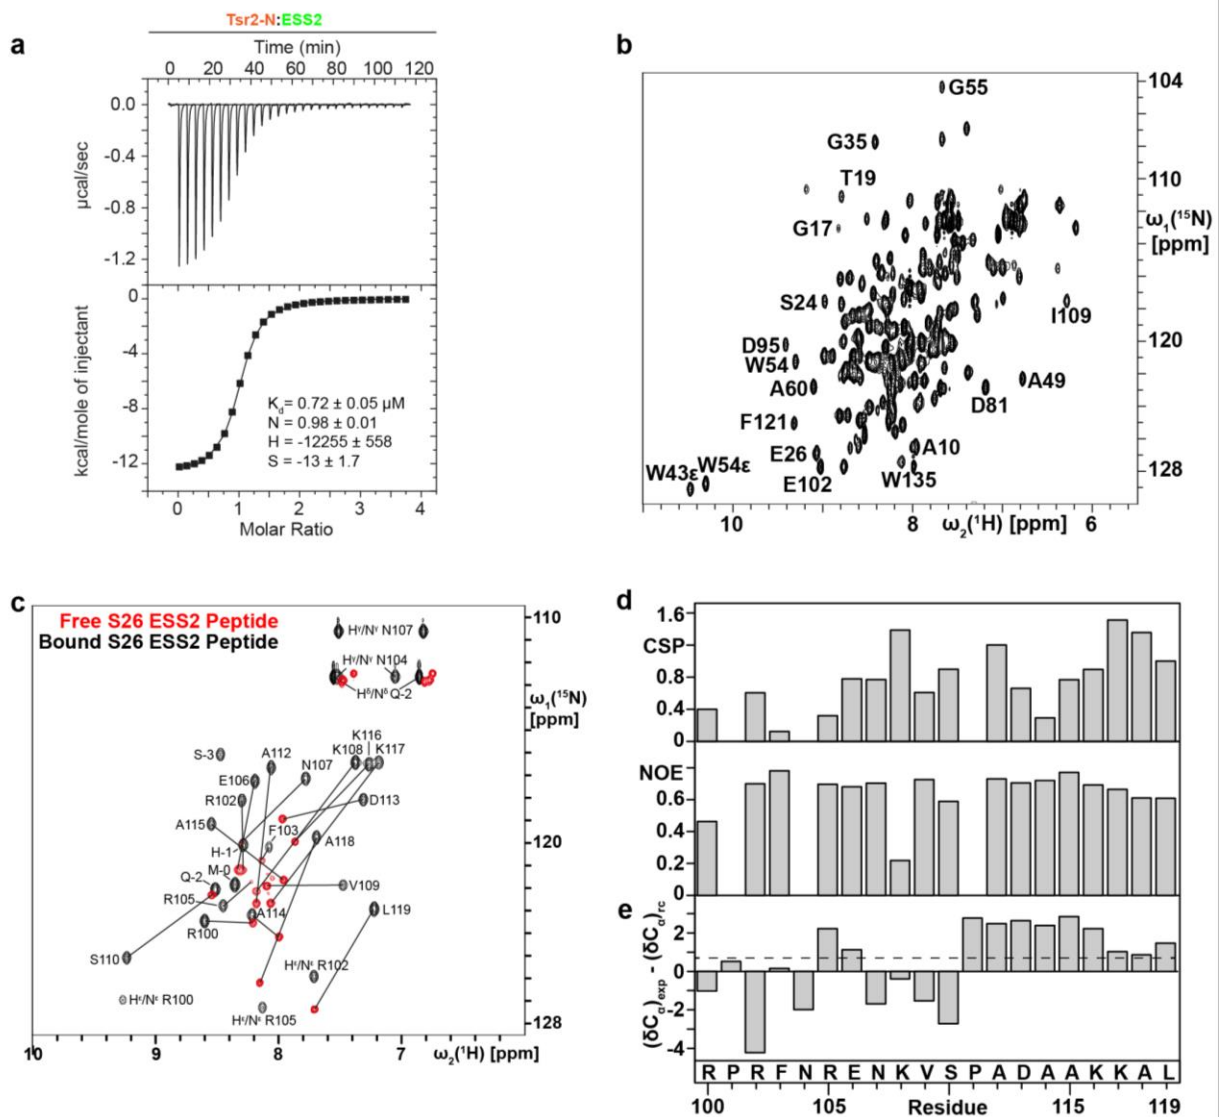

### Supplementary Figure 4

Analysis of the interaction of Tsr2-N and the ESS2 peptide. **(a)** An ITC measurement with yeast Tsr2-N and ESS2 indicates a  $K_d$  of  $0.7 \mu\text{M}$ . **(b)** 2D  $[^1\text{H}, ^{15}\text{N}]$ -HSQC spectrum of  $^{15}\text{N}$ -labeled Tsr2-N in complex with unlabeled ESS2 recorded at 293.15 K. The assignments of a number of characteristic Tsr2-N resonances are indicated. **(c)** Superposition of 2D  $[^1\text{H}, ^{15}\text{N}]$ -HSQC spectra of free  $^{15}\text{N}$ -labeled ESS2 (red signals) and in complex with unlabeled Tsr2-N (black signals) at 293.15 K. The resonance assignments of the bound conformation are indicated and connected by a line to the corresponding signals in the free form. Labels with superscripts denote sidechain resonances. The resonances for the expression tag are denoted according to their sequential position with respect to residue R100; S-3, Q-2, H-1 and M-0 **(d)** Combined  $^1\text{H}$  and  $^{15}\text{N}$  chemical shift perturbation (CSP) and  $\{^1\text{H}\}^{15}\text{N}$  NOE values of the ESS2 amide resonances upon binding to Tsr2-N are indicated in upper and lower panels respectively. **(e)** Secondary structure analysis of individual ESS2 residues in the complex with Tsr2-N based on the  $^{13}\text{C}\alpha$  shift deviation from random coil values. The dotted line indicates a standard deviation value of 0.7 ppm.

### Tsr2 sequence alignment

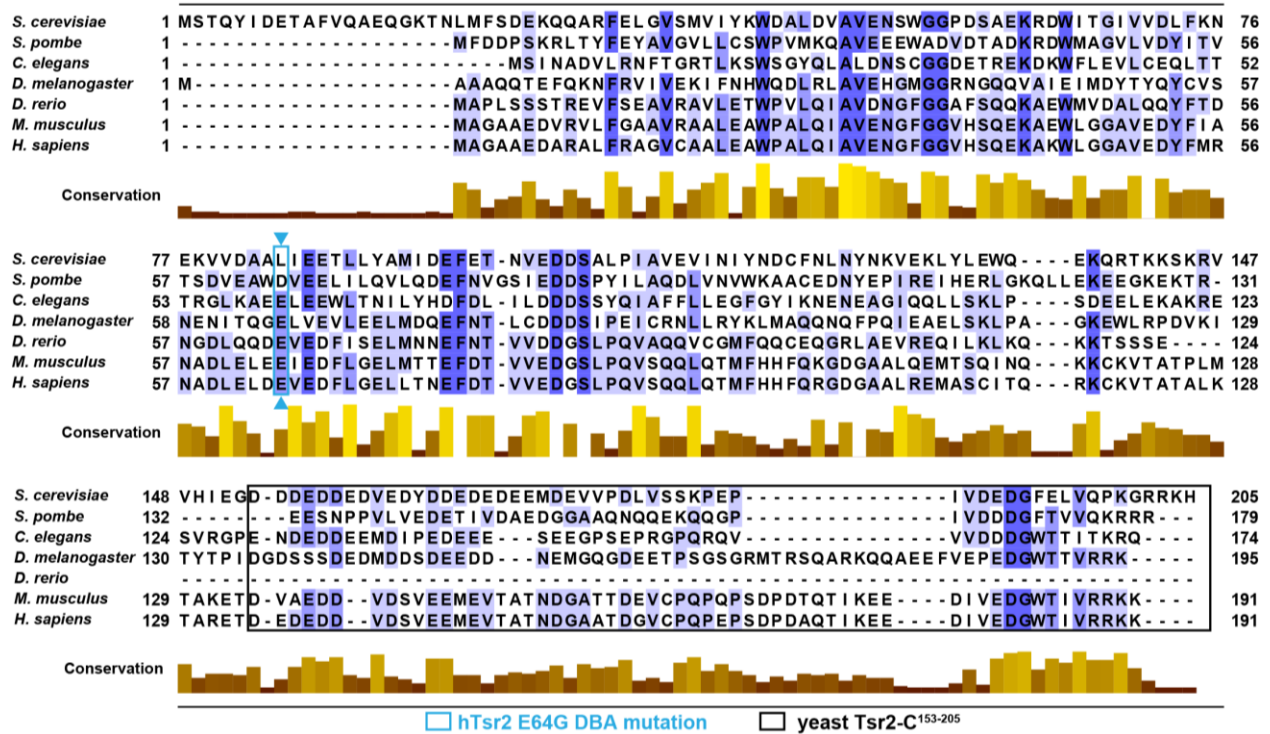

### Supplementary Figure 5

Sequence conservation of Tsr2 in eukaryotes. Alignment was performed for indicated eukaryotic organisms<sup>3</sup>.

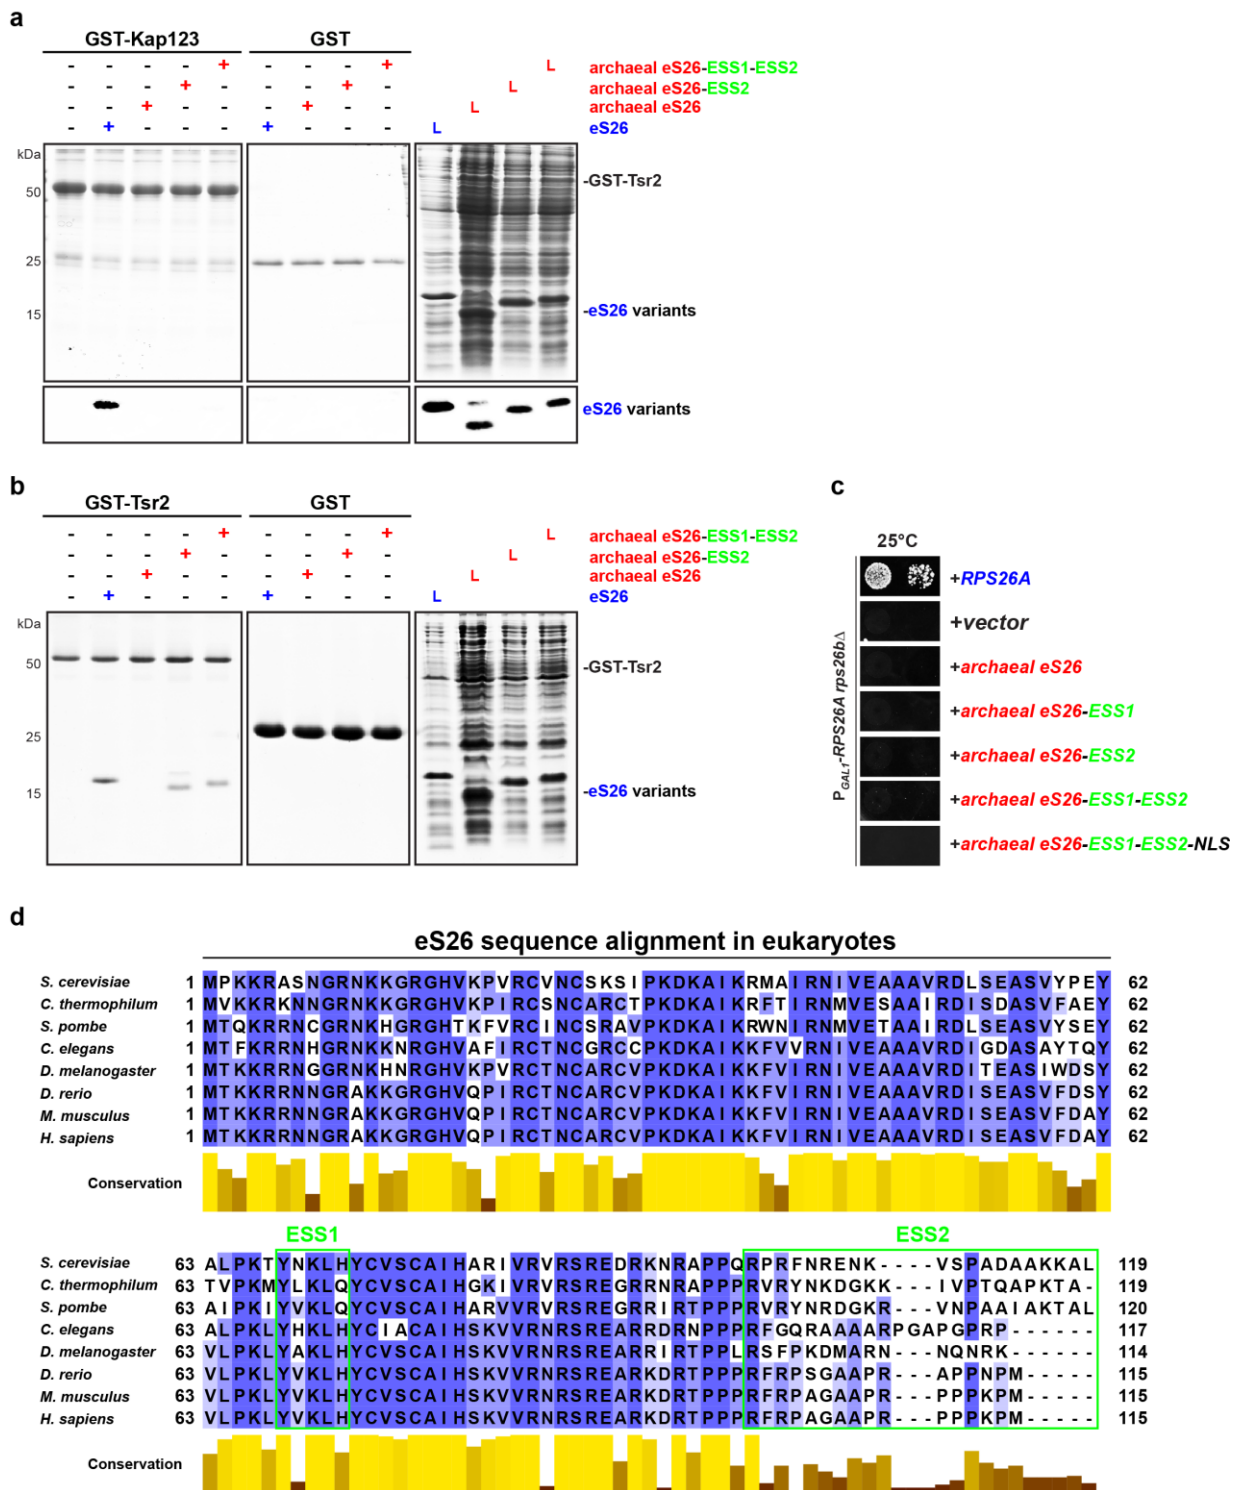

### Supplementary Figure 6

Archaeal eS26 does not interact with importin Kap123 and the escortin Tsr2 (a) GST-Kap123 was immobilized on Glutathione Sepharose and incubated with FLAG-tagged yeast eS26 or FLAG-tagged archaeal eS26 from *Sulfolobus solfataricus* containing ESS1 and ESS2 insertions as indicated in Fig. 1c. Bound proteins were analyzed by Coomassie Blue staining and Western analyses used the  $\alpha$ -FLAG antibody. L= input (1:10 diluted). (b) GST-Tsr2 was immobilized and incubated with eS26 variants as above (c) Archaeal eS26 variants that bind Tsr2 *in vitro* are unable to complement the lethality of the eS26-depletion strain. The conditional  $P_{GAL1}$ -*RPS26A**rps26b* $\Delta$  strain was

transformed with the indicated variants of archaeal eS26 and spotted in 10-fold dilutions on repressive glucose-containing media and grown at 25°C for 4 days. **(d)** Sequence alignment of eS26 in eukaryotic organisms<sup>3</sup>.

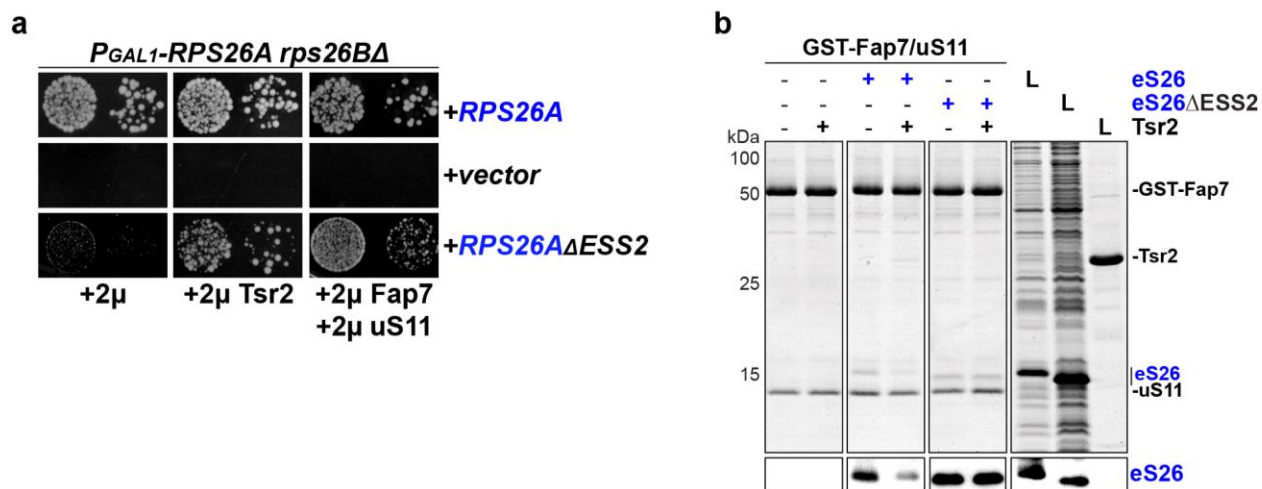

### Supplementary Figure 7

Fap7:uS11 bypasses the need for Tsr2 in an ESS2-independent manner. **(a)** Overexpression of Tsr2 or Fap7:uS11 rescues growth impairment of eS26 $\Delta$ ESS2. The conditional *P<sub>GAL1</sub>-RPS26A rps26 $\Delta$*  strain was transformed with the indicated 2 $\mu$  high-copy plasmids and spotted in 10-fold dilutions on repressive glucose-containing media and grown at 25°C for 4 days. **(b)** eS26 $\Delta$ ESS2 is efficiently recruited to Fap7:uS11. GST-Fap7:uS11:eS26 or GS-Fap7:uS11:eS26 $\Delta$ ESS2 was immobilized on Glutathione Sepharose and incubated with Tsr2. Bound proteins were analyzed by Coomassie Blue staining and Western analyses against FLAG-tagged eS26. L= input (1:10 diluted).

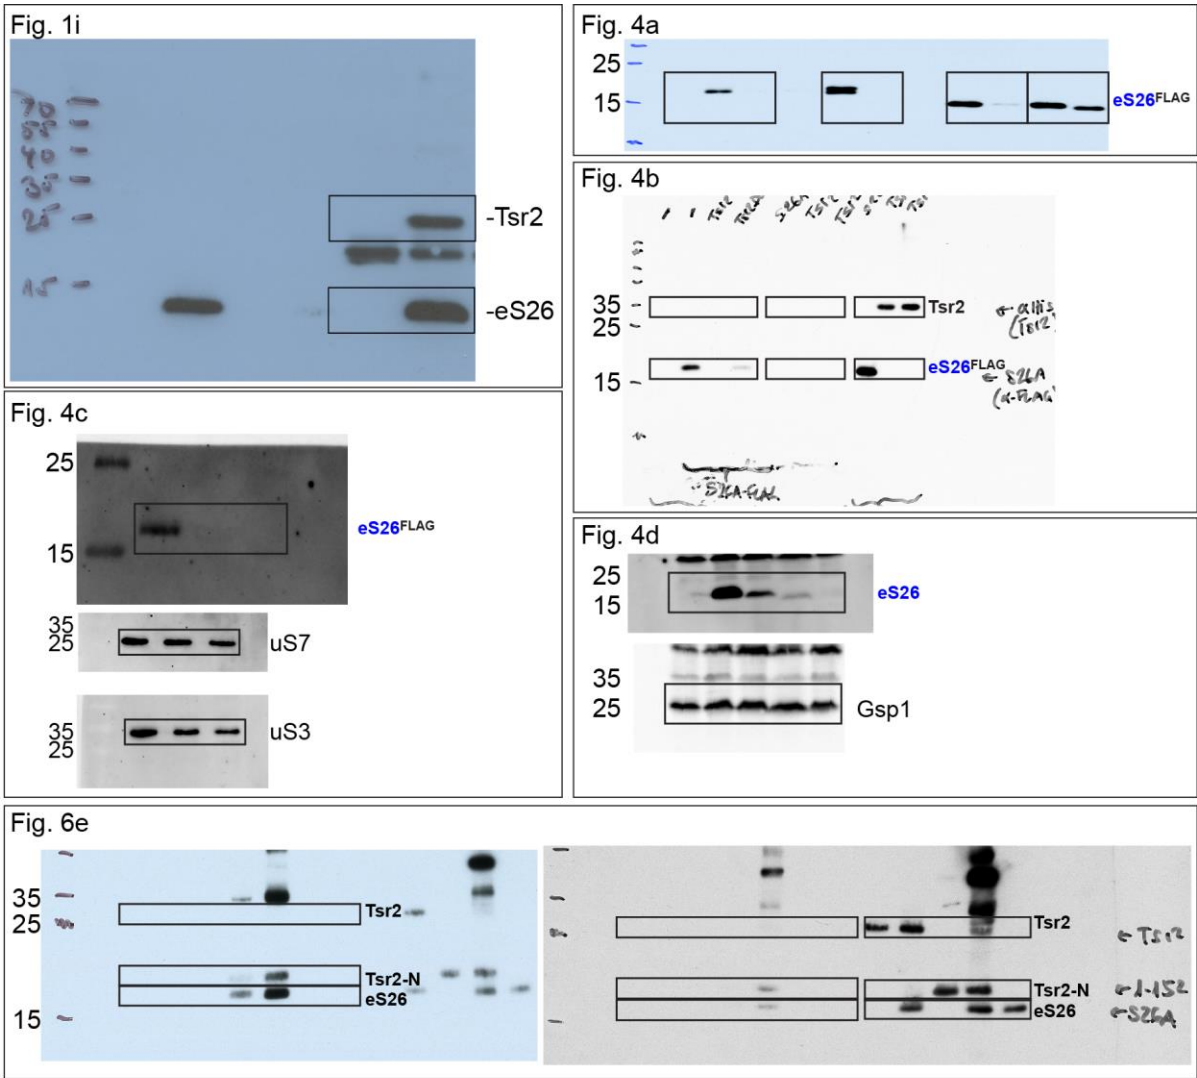

**Supplementary Figure 8**  
Uncropped Western blots from main figures

Supplementary Table 1. XL-MS crosslinks between eS26 and Tsr2

| <b>Id</b>                                  | <b>Protein1</b>         | <b>Protein2</b>         | <b>XLType</b>    | <b>Abs Pos 1</b> | <b>Abs Pos 2</b> | <b>Id-Score</b> | <b>Cross-linker</b> | <b>Protease</b> | <b>Instrument</b> |
|--------------------------------------------|-------------------------|-------------------------|------------------|------------------|------------------|-----------------|---------------------|-----------------|-------------------|
| TNLMFSDEKQQAR-VSPADAAKK-a9-b8              | sp Q06672 T SR2_YEAST   | sp P39938 R S26A_YEAS T | inter-protein xl | 27               | 116              | <b>35.04</b>    | DSS                 | trypsin         | OT Elite          |
| LYLEWQEKQR-GHVKPVR-a8-b4                   | sp Q06672 T SR2_YEAST   | sp P39938 R S26A_YEAS T | inter-protein xl | 138              | 19               | <b>32.56</b>    | DSS                 | trypsin         | OT Elite          |
| LYLEWQEKQR-VSPADAAKK-a8-b8                 | sp Q06672 T SR2_YEAST   | sp P39938 R S26A_YEAS T | inter-protein xl | 138              | 116              | <b>26.94</b>    | DSS                 | trypsin         | OT Elite          |
| FELGVSMVIYK-VSPADAAK-a2-b5                 | sp Q06672 T SR2_YEAST   | sp P39938 R S26A_YEAS T | inter-protein xl | 33               | 113              | <b>27.82</b>    | PDH                 | trypsin         | OT Elite          |
| FNRENKVSPADAAK-FELGVSMVIYK-a6-b2           | sp P39938 R S26A_YEAS T | sp Q06672 T SR2_YEAST   | inter-protein xl | 108              | 33               | <b>31.36</b>    | PDH ZL              | trypsin         | OT Elite          |
| ENKVSPADAAK-FELGVSMVIYK-a3-b2              | sp P39938 R S26A_YEAS T | sp Q06672 T SR2_YEAST   | inter-protein xl | 108              | 33               | <b>29.63</b>    | PDH ZL              | trypsin         | OT Elite          |
| FELGVSMVIYK-VSPADAAKK-a2-b8                | sp Q06672 T SR2_YEAST   | sp P39938 R S26A_YEAS T | inter-protein xl | 33               | 116              | <b>26.73</b>    | PDH ZL              | trypsin         | OT Elite          |
| WDALDVAVENSWGGPDSAEK-ENKVSPADAAK-a16-b3    | sp Q06672 T SR2_YEAST   | sp P39938 R S26A_YEAS T | inter-protein xl | 58               | 108              | <b>23.55</b>    | PDH ZL              | trypsin         | OT Elite          |
| WDALDVAVENSWGGPDSAEK-ENKVSPADAAK-a19-b3    | sp Q06672 T SR2_YEAST   | sp P39938 R S26A_YEAS T | inter-protein xl | 61               | 108              | <b>22.21</b>    | PDH ZL              | trypsin         | OT Elite          |
| NIVEAAAVR-LYLEWQEK-a4-b7                   | sp P39938 R S26A_YEAS T | sp Q06672 T SR2_YEAST   | inter-protein xl | 46               | 137              | <b>27</b>       | ADH                 | trypsin         | OT XL             |
| NIVEAAAVR-LYLEWQEK-a4-b4                   | sp P39938 R S26A_YEAS T | sp Q06672 T SR2_YEAST   | inter-protein xl | 46               | 134              | <b>19.14</b>    | ADH                 | trypsin         | OT XL             |
| VEKLYLEWQEK-GHVKPVR-a3-b4                  | sp Q06672 T SR2_YEAST   | sp P39938 R S26A_YEAS T | inter-protein xl | 130              | 19               | <b>22.77</b>    | DSS                 | trypsin         | OT XL             |
| TNLMFSDEKQQAR-VSPADAAKK-a9-b8              | sp Q06672 T SR2_YEAST   | sp P39938 R S26A_YEAS T | inter-protein xl | 27               | 116              | <b>21.18</b>    | DSS                 | trypsin         | OT XL             |
| CVNCSKSIPK-DKAIK-a6-b2                     | sp P39938 R S26A_YEAS T | sp P39938 R S26A_YEAS T | intra-protein xl | 28               | 34               | <b>33.8</b>     | DSS                 | trypsin         | OT Elite          |
| TYNKLHYCVSCAIHAR-GHVKPVR-a4-b4             | sp P39938 R S26A_YEAS T | sp P39938 R S26A_YEAS T | intra-protein xl | 70               | 19               | <b>32.44</b>    | DSS                 | trypsin         | OT Elite          |
| TYNKLHYCVSCAIHAR-GRGHVQPVR-a4-b6           | sp P39938 R S26A_YEAS T | sp P39938 R S26A_YEAS T | intra-protein xl | 70               | 19               | <b>26.09</b>    | DSS                 | trypsin         | OT Elite          |
| TAFVQAEQKNTLMFSDE-KQARFE-a10-b1            | sp Q06672 T SR2_YEAST   | sp Q06672 T SR2_YEAST   | intra-protein xl | 18               | 27               | <b>29.59</b>    | DSS                 | Glu-C           | OT Elite          |
| MDEVVPLDVSSKPEPIVD-EDGFELVQPKGRRKH-a12-b14 | sp Q06672 T SR2_YEAST   | sp Q06672 T SR2_YEAST   | intra-protein xl | 184              | 204              | <b>24.99</b>    | DSS                 | Glu-C           | OT Elite          |
| KQARFE-KLYLE-a1-b1                         | sp Q06672 T SR2_YEAST   | sp Q06672 T SR2_YEAST   | intra-protein xl | 27               | 130              | <b>22.53</b>    | DSS                 | Glu-C           | OT Elite          |

|                                         |                               |                               |                      |     |     |              |           |             |             |
|-----------------------------------------|-------------------------------|-------------------------------|----------------------|-----|-----|--------------|-----------|-------------|-------------|
| QGKTNLMFSDK-<br>KQARFE-a10-b1           | sp Q06672 T<br>SR2_YEAST      | sp Q06672 T<br>SR2_YEAST      | intra-<br>protein xl | 25  | 27  | <b>25.09</b> | PDH<br>ZL | Glu-C       | OT<br>Elite |
| NIVEAAVR-<br>VSPADAAK-a4-b5             | sp P39938 R<br>S26A_YEAS<br>T | sp P39938 R<br>S26A_YEAS<br>T | intra-<br>protein xl | 46  | 113 | <b>22.91</b> | ADH       | trypsi<br>n | OT<br>XL    |
| ALDYKDDDDK-<br>VSPADAAK-a5-b8           | sp P39938 R<br>S26A_YEAS<br>T | sp P39938 R<br>S26A_YEAS<br>T | intra-<br>protein xl | 122 | 116 | <b>28.72</b> | DSS       | trypsi<br>n | OT<br>XL    |
| TYNKLHYCVSCAIH<br>AR-GHVKPV-a4-<br>b4   | sp P39938 R<br>S26A_YEAS<br>T | sp P39938 R<br>S26A_YEAS<br>T | intra-<br>protein xl | 70  | 19  | <b>23.14</b> | DSS       | trypsi<br>n | OT<br>XL    |
| FNRENVSPADAA<br>K-KALDYKDDDDK-<br>a6-b1 | sp P39938 R<br>S26A_YEAS<br>T | sp P39938 R<br>S26A_YEAS<br>T | intra-<br>protein xl | 108 | 117 | <b>21.82</b> | DSS       | trypsi<br>n | OT<br>XL    |
| CVNCSKSIK-<br>GRGHVKPV-a6-<br>b6        | sp P39938 R<br>S26A_YEAS<br>T | sp P39938 R<br>S26A_YEAS<br>T | intra-<br>protein xl | 28  | 19  | <b>21.42</b> | DSS       | trypsi<br>n | OT<br>XL    |
| ENKVSPADAAK-<br>KALDYKDDDDK-<br>a3-b1   | sp P39938 R<br>S26A_YEAS<br>T | sp P39938 R<br>S26A_YEAS<br>T | intra-<br>protein xl | 108 | 117 | <b>18.04</b> | DSS       | trypsi<br>n | OT<br>XL    |
| TYNKLHYCVSCAIH<br>AR-SIPKDK-a4-b4       | sp P39938 R<br>S26A_YEAS<br>T | sp P39938 R<br>S26A_YEAS<br>T | intra-<br>protein xl | 70  | 32  | <b>22.18</b> | DSS       | trypsi<br>n | OT<br>XL    |
| ENKVSPADAAK-<br>KALDYK-a3-b1            | sp P39938 R<br>S26A_YEAS<br>T | sp P39938 R<br>S26A_YEAS<br>T | intra-<br>protein xl | 108 | 117 | <b>16.56</b> | DSS       | trypsi<br>n | OT<br>XL    |
| FNRENVSPADAA<br>K-KALDYK-a6-b1          | sp P39938 R<br>S26A_YEAS<br>T | sp P39938 R<br>S26A_YEAS<br>T | intra-<br>protein xl | 108 | 117 | <b>17.39</b> | DSS       | trypsi<br>n | OT<br>XL    |
| ENKVSPADAAK-<br>KALDYKDDDDK-<br>a3-b6   | sp P39938 R<br>S26A_YEAS<br>T | sp P39938 R<br>S26A_YEAS<br>T | intra-<br>protein xl | 108 | 122 | <b>18.31</b> | DSS       | trypsi<br>n | OT<br>XL    |
| CVNCSKSIK-<br>GHVKPV-a6-b4              | sp P39938 R<br>S26A_YEAS<br>T | sp P39938 R<br>S26A_YEAS<br>T | intra-<br>protein xl | 28  | 19  | <b>17.64</b> | DSS       | trypsi<br>n | OT<br>XL    |
| TYNKLHYCVSCAIH<br>AR-GRGHVKPV-a4-<br>b6 | sp P39938 R<br>S26A_YEAS<br>T | sp P39938 R<br>S26A_YEAS<br>T | intra-<br>protein xl | 70  | 19  | <b>18.61</b> | DSS       | trypsi<br>n | OT<br>XL    |

#### Description of the column headers

|                 |                                                                                                                                                    |
|-----------------|----------------------------------------------------------------------------------------------------------------------------------------------------|
| <i>Id</i>       | Assigned peptides and cross-linking sites within the <i>peptide</i> sequences. The longer peptide is designated as (a)lpha, the shorter as (b)eta. |
| <i>Protein1</i> | SwissProt/UniProt accession number and identifier of the protein 1 (containing peptide designated as alpha).                                       |
| <i>Protein2</i> | SwissProt/UniProt accession number and identifier of the protein 2 (containing peptide designated as beta).                                        |
| <i>XLType</i>   | Intra- or inter-protein, sometimes also ambiguous.                                                                                                 |
| <i>AbsPos1</i>  | Position in the <i>protein</i> sequence of protein 1.                                                                                              |
| <i>AbsPos2</i>  | Position in the <i>protein</i> sequence of protein 2.                                                                                              |
| <i>Id-score</i> | Identification score as assigned by xQuest. The higher, the better.                                                                                |

Supplementary Table 2. Input for the structure calculation and characterization of the 20 energy-minimized NMR structures of TSR2-N

| Parameter                                                              | Value <sup>a</sup>  |
|------------------------------------------------------------------------|---------------------|
| NOE upper distance limits                                              | 3818                |
| Intra-residual                                                         | 918                 |
| Short-range                                                            | 1058                |
| Medium-range                                                           | 1071                |
| Long-range                                                             | 771                 |
| Dihedral angle constraints ( $\phi$ , $\psi$ , $\chi^1$ and $\chi^2$ ) | 521                 |
| Residual target function ( $\text{\AA}^2$ )                            | $2.23 \pm 0.08$     |
| Residual distance constraint violations                                |                     |
| Number $\geq 0.2 \text{\AA}$                                           | $3 \pm 1.3$         |
| Maximum ( $\text{\AA}$ )                                               | $0.32 \pm 0.10$     |
| Residual dihedral angle constraint violations                          |                     |
| Number $\geq 2.5^\circ$                                                | $0.0 \pm 0.0$       |
| Maximum ( $^\circ$ )                                                   | $0.69 \pm 0.31$     |
| Mean AMBER energy (kcal/mol)                                           | $-4265 \pm 17$      |
| RMSD from ideal geometry                                               |                     |
| Bond lengths ( $\text{\AA}$ )                                          | $0.0037 \pm 0.0000$ |
| Bond angles ( $^\circ$ )                                               | $1.436 \pm 0.008$   |
| RMSD to the mean coordinates ( $\text{\AA}$ ) <sup>b</sup>             |                     |
| Backbone heavy atoms                                                   | $0.50 \pm 0.12$     |
| All heavy atoms                                                        | $0.89 \pm 0.13$     |
| Ramachandran plot statistics (%) <sup>c</sup>                          |                     |
| Most favored regions                                                   | $85.8 \pm 0.8$      |
| Additionally allowed regions                                           | $13.9 \pm 0.8$      |
| Generously allowed regions                                             | $0.3 \pm 0.4$       |
| Disallowed regions                                                     | $0.0 \pm 0.0$       |

<sup>a</sup> Except for the top six entries, the data characterize 20 CYANA conformers after energy-minimization with AMBER that are used to represent the NMR structure; the mean values and standard deviations are given.

<sup>b</sup> Backbone heavy atoms include N, C $^\alpha$  and C'. The RMSD values are calculated for residues 10–140.

<sup>c</sup> As determined by PROCHECK.

Supplementary Table 3. Input for the structure calculation and characterization of the 20 energy-minimized NMR structures of TSR2-N in complex with ESS2

| Parameter                                                              | Value <sup>a</sup>  |
|------------------------------------------------------------------------|---------------------|
| NOE upper distance limits                                              | 4418                |
| Tsr2-N                                                                 | 3569                |
| Intra-residual                                                         | 831                 |
| Short-range                                                            | 923                 |
| Medium-range                                                           | 937                 |
| Long-range                                                             | 878                 |
| ESS2                                                                   | 518                 |
| Intra-residual                                                         | 175                 |
| Short-range                                                            | 183                 |
| Medium-range                                                           | 159                 |
| Long-range                                                             | 1                   |
| Complex Tsr2-N:ESS2                                                    |                     |
| intermolecular                                                         | 331                 |
| Dihedral angle constraints ( $\phi$ , $\psi$ , $\chi^1$ and $\chi^2$ ) | 601                 |
| Tsr2-N                                                                 | 521                 |
| ESS2                                                                   | 80                  |
| Residual target function ( $\text{\AA}^2$ )                            | $3.06 \pm 0.22$     |
| Residual distance constraint violations                                |                     |
| Number $\geq 0.2 \text{\AA}$                                           | $12.0 \pm 2.5$      |
| Maximum ( $\text{\AA}$ )                                               | $0.42 \pm 0.08$     |
| Mean AMBER energy (kcal/mol)                                           | $-5344.3 \pm 20.1$  |
| RMSD from ideal geometry                                               |                     |
| Bond lengths ( $\text{\AA}$ )                                          | $0.0037 \pm 0.0001$ |
| Bond angles ( $^\circ$ )                                               | $1.482 \pm 0.016$   |
| RMSD to the mean coordinates ( $\text{\AA}$ ) <sup>b</sup>             |                     |
| Tsr2-N                                                                 |                     |
| Backbone heavy atoms                                                   | $0.48 \pm 0.10$     |
| All heavy atoms                                                        | $0.98 \pm 0.13$     |
| ESS2                                                                   |                     |
| Backbone heavy atoms                                                   | $0.18 \pm 0.06$     |
| All heavy atoms                                                        | $0.80 \pm 0.23$     |
| Complex Tsr2-N:ESS2                                                    |                     |
| Backbone heavy atoms                                                   | $0.46 \pm 0.09$     |
| All heavy atoms                                                        | $0.97 \pm 0.12$     |
| Ramachandran plot statistics (%) <sup>c</sup>                          |                     |
| Most favored regions                                                   | $90.9 \pm 1.5$      |
| Additionally allowed regions                                           | $9.1 \pm 1.5$       |
| Generously allowed regions                                             | $0.0 \pm 0.0$       |
| Disallowed regions                                                     | $0.0 \pm 0.0$       |

<sup>a</sup> Except for the top six entries, the data characterize 20 CYANA conformers after energy-minimization with AMBER that are used to represent the NMR structure; the mean values and standard deviations are given.

<sup>b</sup> Backbone heavy atoms include N, C<sup>α</sup> and C'. The RMSD values are calculated for residues 10–140 of Tsr2-N and residues 100–119 of ESS2.

<sup>c</sup> As determined by PROCHECK.

Supplementary Table 4. Yeast strains used in this study

| Strain name                                     | Genotype                                                                             | Origin                             |
|-------------------------------------------------|--------------------------------------------------------------------------------------|------------------------------------|
| BY4741                                          | <i>MATa ura3 his3 leu2 met15 TRP1</i>                                                | Euroscarf                          |
| NMY32                                           | <i>MATa trp1 leu2 (lexAop)8-ADE2 LYS2::(lexAop)4-HIS3 URA3::(lexAop)8-lacZ GAL4</i>  | Dualsystems Biotech AG             |
| Enp1-TAP                                        | <i>MATa ura3 leu2 TRP1 ENP1-TAP::HIS3MX</i>                                          | (Schütz et al., 2014) <sup>4</sup> |
| <i>P<sub>GAL1</sub>-TSR2</i>                    | <i>MATa ura3 his3 leu2 met15 TRP1 Gal1-TSR2::natNT2</i>                              | (Schütz et al., 2014)              |
| <i>P<sub>GAL1</sub>-RPS26A rps26bΔ</i>          | <i>MATa ura3 leu2 met15 TRP1 Gal1-RPS26A::natNT2 RPS26B::HIS3MX</i>                  | (Schütz et al., 2014)              |
| Enp1-TAP <i>P<sub>GAL1</sub>-RPS26A rps26bΔ</i> | <i>MATa ura3 leu2 met15 TRP1 Gal1-RPS26A::natNT2 RPS26B::HIS3MX ENP1-TAP::kanMX6</i> | this study                         |

Supplementary Table 5. Plasmids used in this study

|                                                                          |                                                   |                                  |
|--------------------------------------------------------------------------|---------------------------------------------------|----------------------------------|
| pRS425-TSR2                                                              | <i>TSR2 2μ LEU2 AMP</i>                           | (Schütz et al., 2014)            |
| pRS425-TSR2 <sup>1-152</sup>                                             | <i>TSR2<sup>1-152</sup> 2μ LEU2 AMP</i>           | this study                       |
| pRS425-TSR2D64AW65AI66A                                                  | <i>TSR2 D64AW65AI66A 2μ LEU2 AMP</i>              | this study                       |
| pRS425-hTSR2                                                             | <i>humanTSR2 2μ LEU2 AMP</i>                      | this study                       |
| pRS425-hTSR2E64G                                                         | <i>humanTSR2E64G 2μ LEU2 AMP</i>                  | this study                       |
| pRS425-RPS26A                                                            | <i>RPS26A 2μ LEU2 AMP</i>                         | (Schütz et al., 2014)            |
| pRS425-RPS26AΔeSS1                                                       | <i>RPS26AΔeSS1 2μ LEU2 AMP</i>                    | this study                       |
| pRS425-RPS26AΔeSS2 (pRS425-RPS26A <sup>1-99</sup> )                      | <i>RPS26AΔeSS2 2μ LEU2 AMP</i>                    | this study                       |
| pRS425-RPS26AΔeSS1ΔeSS2                                                  | <i>RPS26A ΔeSS1ΔeSS2 2μ LEU2 AMP</i>              | this study                       |
| pRS425-RPS26AΔeSS1 <sup>FLAG</sup>                                       | <i>RPS26AΔeSS1 2μ LEU2 AMP</i>                    | this study                       |
| pRS425-RPS26AΔeSS2 <sup>FLAG</sup> (pRS425-RPS26A <sup>1-99-FLAG</sup> ) | <i>RPS26AΔeSS2 2μ LEU2 AMP</i>                    | this study                       |
| pRS425-RPS26AΔeSS1ΔeSS2 <sup>FLAG</sup>                                  | <i>RPS26A ΔeSS1ΔeSS2 2μ LEU2 AMP</i>              | this study                       |
| pRS425-RPS26AΔ99-104                                                     | <i>RPS26AΔ99-104 2μ LEU2 AMP</i>                  | this study                       |
| pRS425-FAP7-RPS14A                                                       | <i>FAP7 RPS1A 2μ LEU2 AMP</i>                     | (Peña et al., 2016) <sup>5</sup> |
| pLexA-dir-RPS26A                                                         | <i>LexA-RPS26A 2μ TRP1 AMP</i>                    | (Schütz et al., 2014)            |
| pACT-TSR2                                                                | <i>GAL4 AD-TSR2 2μ LEU2 KAN</i>                   | (Schütz et al., 2014)            |
| pACT-TSR2 <sup>1-152</sup>                                               | <i>GAL4 AD-TSR2<sup>1-152</sup> 2μ LEU2 KAN</i>   | this study                       |
| pACT-TSR2 <sup>153-205</sup>                                             | <i>GAL4 AD-TSR2<sup>153-205</sup> 2μ LEU2 KAN</i> | this study                       |
| pACT-LargeT                                                              | <i>GAL4 AD-SV40 largeT antigen 2μ LEU2 KAN</i>    | Dual Systems                     |
| pETduet1-RPS26A                                                          | <i>RPS26A AMP</i>                                 | (Schütz et al., 2014)            |
| pETduet1-RPS26A <sup>FLAG</sup>                                          | <i>RPS26A<sup>FLAG</sup> AMP</i>                  | (Schütz et al., 2014)            |

|                                                                                        |                                                                                 |                       |
|----------------------------------------------------------------------------------------|---------------------------------------------------------------------------------|-----------------------|
| pETduet1- <i>RPS26A</i> ΔeSS1                                                          | <i>RPS26A</i> ΔeSS1 AMP                                                         | this study            |
| pETduet1- <i>RPS26A</i> ΔeSS2<br><i>RPS26A</i> <sup>1-99</sup>                         | <i>RPS26A</i> ΔeSS2 AMP                                                         | this study            |
| pETduet1- <i>RPS26A</i> ΔeSS1ΔeSS2                                                     | <i>RPS26A</i> ΔeSS1ΔeSS2 AMP                                                    | this study            |
| pETduet1- <i>RPS26A</i> ΔeSS1 <sup>FLAG</sup>                                          | <i>RPS26A</i> ΔeSS1 AMP                                                         | this study            |
| pETduet1- <i>RPS26A</i> ΔeSS2 <sup>FLAG</sup><br>pRS425- <i>RPS26A</i> <sup>1-99</sup> | <i>RPS26A</i> ΔeSS2 AMP                                                         | this study            |
| pETduet1- <i>RPS26A</i> ΔeSS1ΔeSS2 <sup>FLAG</sup>                                     | <i>RPS26A</i> ΔeSS1ΔeSS2 AMP                                                    | this study            |
| pETduet1- <i>RPS26A</i> Δ99-104                                                        | <i>RPS26A</i> Δ99-104 AMP                                                       | this study            |
| pETduet1- <i>RPS26A</i> Δ104-109                                                       | <i>RPS26A</i> Δ104-109 AMP                                                      | this study            |
| pETduet1- <i>RPS26A</i> Δ109-114                                                       | <i>RPS26A</i> Δ109-114 AMP                                                      | this study            |
| pETduet1- <i>RPS26A</i> Δ114-119                                                       | <i>RPS26A</i> Δ114-119 AMP                                                      | this study            |
| pETduet1- <i>RPS26A</i> Δ99-109                                                        | <i>RPS26A</i> Δ99-109 AMP                                                       | this study            |
| pETduet1- <i>RPS26A</i> Δ104-114                                                       | <i>RPS26A</i> Δ104-114 AMP                                                      | this study            |
| pETduet1- <i>RPS26A</i> Δ109-119                                                       | <i>RPS26A</i> Δ109-119 AMP                                                      | this study            |
| pETduet1- <i>RPS26A</i> <sup>1-104</sup>                                               | <i>RPS26A</i> <sup>1-104</sup> AMP                                              | this study            |
| pETduet1- <i>RPS26A</i> <sup>1-109</sup>                                               | <i>RPS26A</i> <sup>1-109</sup> AMP                                              | this study            |
| pETduet1- <i>RPS26A</i> <sup>1-114</sup>                                               | <i>RPS26A</i> <sup>1-114</sup> AMP                                              | this study            |
| pETduet1- <i>hRPS26A</i> <sup>FLAG</sup>                                               | <i>humanRPS26A</i> <sup>FLAG</sup> AMP                                          | this study            |
| pETduet1- <i>HIS</i> <sub>6</sub> - <i>TSR2</i>                                        | <i>HIS</i> <sub>6</sub> - <i>TSR2</i> AMP                                       | (Schütz et al., 2014) |
| pETduet1- <i>HIS</i> <sub>6</sub> - <i>TSR2</i> <sup>1-152</sup>                       | <i>HIS</i> <sub>6</sub> - <i>TSR2</i> <sup>1-152</sup> AMP                      | this study            |
| pETduet1- <i>HIS</i> <sub>6</sub> - <i>TSR2</i><br><i>D64AW65A166A</i>                 | <i>HIS</i> <sub>6</sub> - <i>TSR2D64AW65A166A</i> AMP                           | this study            |
| pETduet1- <i>HIS</i> <sub>6</sub> - <i>TSR2</i> - <i>RPS26A</i>                        | <i>HIS</i> <sub>6</sub> - <i>TSR2 RPS26A</i> AMP                                | (Schütz et al., 2014) |
| pETduet1- <i>HIS</i> <sub>6</sub> - <i>TSR2</i> - <i>RPS26A</i> <sup>FLAG</sup>        | <i>HIS</i> <sub>6</sub> - <i>TSR2 RPS26A</i> <sup>FLAG</sup> AMP                | (Schütz et al., 2014) |
| pEM1- <i>TSR2</i>                                                                      | <i>HIS</i> <sub>6</sub> - <i>GB1-TSR2</i> AMP                                   | this study            |
| pEM1- <i>TSR2</i> <sup>1-152</sup>                                                     | <i>HIS</i> <sub>6</sub> - <i>GB1-TSR2</i> <sup>1-152</sup> AMP                  | this study            |
| pEM1- <i>TSR2</i> <sup>153-205</sup>                                                   | <i>HIS</i> <sub>6</sub> - <i>GB1-TSR2</i> <sup>153-205</sup> AMP                | this study            |
| pEM1- <i>TSR2</i> - <i>RPS26A</i>                                                      | <i>HIS</i> <sub>6</sub> - <i>GB1-TSR2 RPS26A</i> AMP                            | this study            |
| pEM1- <i>TSR2</i> <sup>1-152</sup> - <i>RPS26A</i>                                     | <i>HIS</i> <sub>6</sub> - <i>GB1-TSR2</i> <sup>1-152</sup> <i>RPS26A</i> AMP    | this study            |
| pEM1- <i>RPS26A</i> <sup>99-119</sup>                                                  | <i>HIS</i> <sub>6</sub> - <i>GB1-RPS26A</i> <sup>99-119</sup> <i>RPS26A</i> AMP | this study            |
| pGEX-6P-1- <i>RPS26A</i>                                                               | <i>GST-RPS26A</i> AMP                                                           | this study            |
| pGEX-6P-1- <i>TSR2</i>                                                                 | <i>GST-TSR2</i> AMP                                                             | (Schütz et al., 2014) |
| pGEX-6P-1- <i>TSR2</i> <sup>1-152</sup>                                                | <i>GST-TSR2</i> <sup>1-152</sup> AMP                                            | this study            |
| pGEX-6P-1- <i>TSR2</i> <sup>153-205</sup>                                              | <i>GST-TSR2</i> <sup>153-205</sup> AMP                                          | this study            |
| pGEX-6P-1- <i>hTSR2</i>                                                                | <i>humanTSR2</i> 2μ <i>LEU2</i> AMP                                             | this study            |
| pGEX-6P-1- <i>hTSR2E64G</i>                                                            | <i>humanTSR2E64G</i> 2μ <i>LEU2</i> AMP                                         | this study            |
| pGEX-4TEV- <i>KAP123</i>                                                               | <i>GST-KAP123</i> AMP                                                           | (Schütz et al., 2014) |

## Supplementary References

1. Wishart, D.S. & Sykes, B.D. The <sup>13</sup>C chemical-shift index: a simple method for the identification of protein secondary structure using <sup>13</sup>C chemical-shift data. *J Biomol NMR* **4**, 171-80 (1994).
2. Ben-Shem, A., Garreau de Loubresse, N., Melnikov, S., Jenner, L., Yusupova, G. & Yusupov, M. The structure of the eukaryotic ribosome at 3.0 Å resolution. *Science* **334**, 1524-9 (2011). [10.1126/science.1212642](https://doi.org/10.1126/science.1212642)
3. Sievers, F. & Higgins, D.G. Clustal Omega, accurate alignment of very large numbers of sequences. *Methods Mol Biol* **1079**, 105-16 (2014). [10.1007/978-1-62703-646-7\\_6](https://doi.org/10.1007/978-1-62703-646-7_6)
4. Schütz, S., Fischer, U., Altvater, M., Nerurkar, P., Pena, C., Gerber, M., Chang, Y., Caesar, S., Schubert, O.T., Schlenstedt, G. & Panse, V.G. A RanGTP-independent mechanism allows ribosomal protein nuclear import for ribosome assembly. *Elife* **3**, e03473 (2014). [10.7554/eLife.03473](https://doi.org/10.7554/eLife.03473)
5. Pena, C., Schutz, S., Fischer, U., Chang, Y. & Panse, V.G. Prefabrication of a ribosomal protein subcomplex essential for eukaryotic ribosome formation. *Elife* **5**(2016). [10.7554/eLife.21755](https://doi.org/10.7554/eLife.21755)
